# Supplementary material for: Enhancing oxygen reaction kinetics in lanthanum nickelate Ruddlesden–Popper electrodes via praseodymium oxide infiltration for solid oxide cells
Source: Royal Society of Chemistry journal article supplement (doi:10.1039/d4dt02277g), 2024-01-01
Supplement: d4dt02277g1.pdf [file d4dt02277g1.pdf]

## Supplementary Information for:

### Enhancing oxygen reaction kinetics in lanthanum nickelate *Ruddlesden-Popper* electrodes via praseodymium oxide infiltration for Solid Oxide Cells

Morena B. Farias<sup>a</sup>, Allan J. M. Araújo<sup>b,c,\*</sup>, Carlos A. Paskocimas<sup>a</sup>,

Duncan P. Fagg<sup>b,c</sup>, Francisco J. A. Loureiro<sup>b,c,\*\*</sup>

<sup>a</sup> Materials Science and Engineering Postgraduate Program – PPGCEM, Federal University of Rio Grande do Norte – UFRN, 59078-970 Natal, Brazil

<sup>b</sup> TEMA - Centre for Mechanical Technology and Automation, Department of Mechanical Engineering, University of Aveiro, 3810-193 Aveiro, Portugal

<sup>c</sup> LASI - Intelligent Systems Associate Laboratory, 4800-058 Guimarães, Portugal

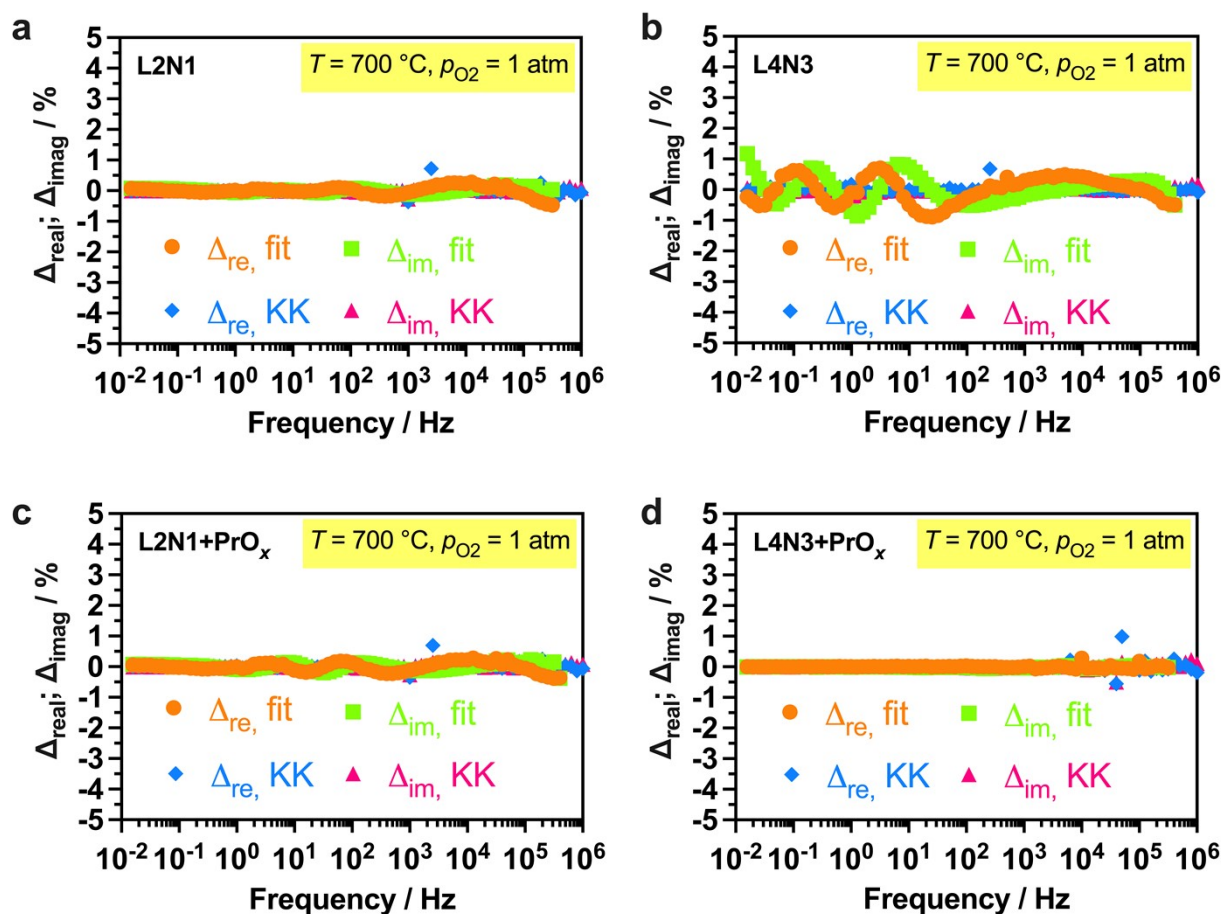

**Fig. S1.** Residual plots for the Equivalent Circuit Model (ECM) and *Kramers-Kronig* (KK) validation at 700 °C in oxygen: a) L2N1; b) L4N3; c) L2N1+PrO<sub>x</sub>; d) L4N3+PrO<sub>x</sub>.

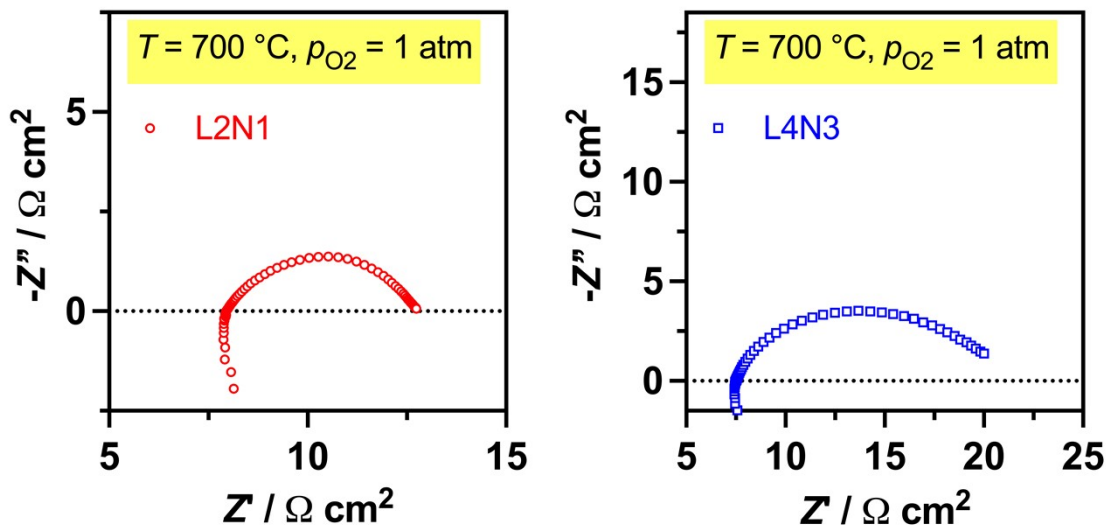

Fig. S2. Impedance spectra for the non-impregnated samples.

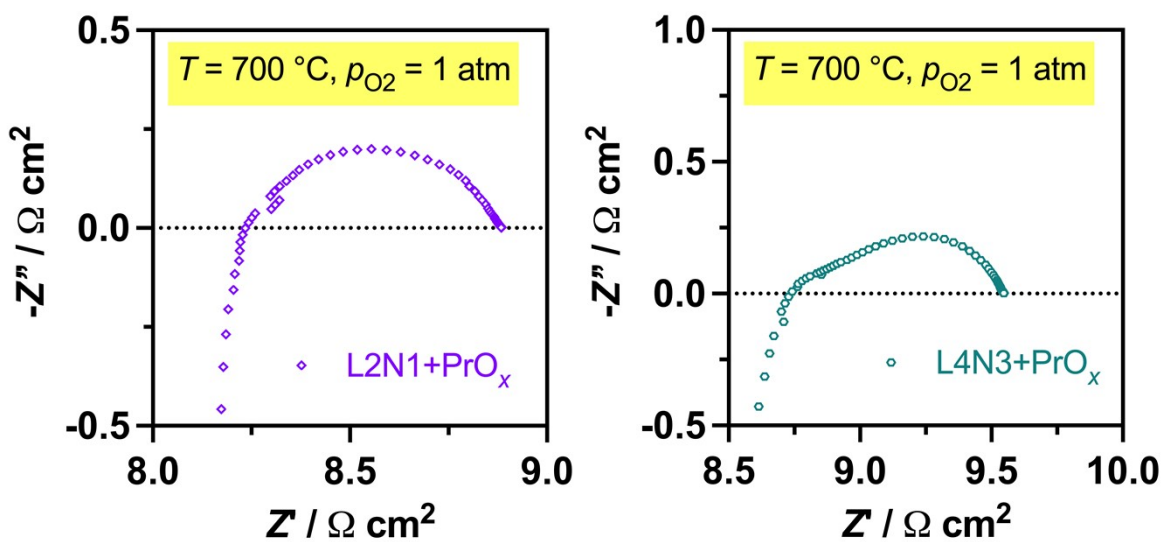

Fig. S3. Impedance spectra for the  $\text{PrO}_x$ -impregnated samples.
